# Supplementary material for: Pupillary Pain Index Predicts Postoperative Pain but Not the Effect of Peripheral Regional Anaesthesia in Patients Undergoing Total Hip or Total Knee Arthroplasty: An Observational Study
Source: MDPI journal article supplement (doi:10.3390/medicina59050826), 2023-04-23
Supplement: s1 [file s1]

**Table S1.** Total hip replacement (THR) and total knee replacement (TKR) groups comparisons.

| Parameter                              | THR group, N = 18 | TKR group, N = 17 | P value |
|----------------------------------------|-------------------|-------------------|---------|
| Age, years                             | 63.11 ± 14.76     | 71.94 ± 9.7       | 0.11    |
| Body mass index                        | 28.26 ± 7.73      | 30.57 ± 4.8       | 0.08    |
| <b>Anesthesia type, n(%):</b>          |                   |                   |         |
| General anesthesia                     | 18(100%)          | 14(82.4%)         | 0.06    |
| Total intravenous anesthesia           | 0(0%)             | 3(17.6%)          |         |
| <b>Regional anesthesia type, n(%):</b> |                   |                   |         |
| Fascia iliaca block                    | 18(100%)          | 9(52.9%)          | <0.001  |
| Adductor canal block                   | 0(0%)             | 8(47.1)           |         |
| Anesthesia time, min                   | 225.11 ± 51.25    | 201.76 ± 46       | 0.17    |
| Surgery time, min                      | 149.94 ± 127.92   | 111 ± 36.97       | 0.43    |
| <b>Intraoperative opioids dosage:</b>  |                   |                   |         |
| Remifentanyl, mcg                      | 8.52 ± 5.33       | 6.25 ± 4.62       | 0.21    |
| Fentanyl, mg                           | 0.36 ± 0.11       | 0.36 ± 0.16       | 0.88    |
| Piritramide in MED, mg                 | 6.3 ± 6.86        | 3.25 ± 2.86       | 0.13    |
| <b>Postoperative opioids dosage:</b>   |                   |                   |         |
| 24-hours PO opioids in MED, mg         | 35.53 ± 46.04     | 15.47 ± 13.09     | 0.01    |
| 48-hours PO opioids in MED, mg         | 44.1 ± 52.36      | 16.69 ± 28.27     | 0.03    |
| <b>PCA type, n(%):</b>                 |                   |                   |         |
| Tramadol                               | 12(66.7%)         | 4(23.5%)          | 0.01    |
| Piritramide                            | 6(33.3%)          | 13(76.5%)         | 0.01    |
| <b>Postoperative NRS:</b>              |                   |                   |         |
| NRS PACU                               | 1.44 ± 0.7        | 1.41 ± 0.87       | 0.97    |
| NRS 24h, rest                          | 1.61 ± 1.42       | 1.41 ± 1.46       | 0.69    |
| NRS 24h, movement                      | 3.56 ± 2.01       | 3.06 ± 1.39       | 0.83    |
| NRS 48h, rest                          | 1.67 ± 1.91       | 0.94 ± 1.03       | 0.24    |
| NRS 48h, movement                      | 3.17 ± 1.58       | 2.12 ± 1.41       | 0.05    |

Data is presented as number (%), and mean ± standard deviation; for age and body mass index – mean (range). Remifentanyl dose ratio calculated as a total remifentanyl dose in mcg/surgery time in minutes. PCA – patient controlled analgesia; NRS – Numeric rating scale; PACU – post anaesthesia care unit; MED – morphine equivalent dose. For piritramide MED is calculated as 1 mg of piritramide = 0.7 mg of morphine; for tramadol – 10 mg of tramadol = 1 mg of morphine. P value for continuous variables – Mann-Whitney test; for categorical variables – Chi-square test.

**Table S2.** Simple regression analysis for independent variables of pain scores.

| Simple regression                    | Unstandardized B coefficient (95% CI), p value | Adjusted r squared |
|--------------------------------------|------------------------------------------------|--------------------|
| <b>NRS PACU</b>                      |                                                |                    |
| Surgery type                         | -0.324(-0.872-0.225), p = 0.239                | 0.013              |
| PCA type                             | 0.059(-0.503-0.621), p = 0.832                 | -0.029             |
| Piritramide perioperative in MED, mg | 0.063(0.008-0.118), p = 0.026                  | 0.115              |
| Control PPI before block             | -0.051(-0.155-0.053), p = 0.327                | 0                  |
| Target PPI before block              | -0.008(-0.113-0.096), p = 0.874                | -0.03              |
| Control PPI after block              | -0.014(-0.149-0.122), p = 0.837                | -0.029             |
| Target PPI after block               | -0.03(-0.259-0.2), p = 0.795                   | -0.028             |
| <b>NRS 24-hour at rest</b>           |                                                |                    |
| Surgery type                         | 0.19(-0.561-0.94), p = 0.611                   | -0.022             |
| PCA type                             | -0.118(-0.873-0.636), p = 0.751                | -0.027             |
| Piritramide perioperative in MED, mg | 0.098(0.026-0.17), p = 0.009                   | 0.165              |
| PCA opioids 24-hour                  | 0.015(-0.013-0.044), p = 0.29                  | 0.005              |
| Control PPI before block             | 0.053(-0.088-0.194), p = 0.45                  | -0.012             |
| Target PPI before block              | 0.108(-0.027-0.243), p = 0.114                 | 0.046              |
| Control PPI after block              | -0.066(-0.247-0.115), p = 0.461                | -0.013             |
| Target PPI after block               | 0.193(-0.107-0.494), p = 0.2                   | 0.02               |
| <b>NRS 24-hour in movement</b>       |                                                |                    |
| Surgery type                         | 0.637(-0.249-1.523), p = 0.153                 | 0.032              |
| PCA type                             | -0.263(-1.176-0.65), p = 0.561                 | -0.02              |
| Piritramide perioperative in MED, mg | 0.109(0.02-0.197), p = 0.018                   | 0.133              |
| PCA opioids 24-hour                  | 0.017(-0.017-0.052), p = 0.314                 | 0.001              |
| Control PPI before block             | 0.097(-0.072-0.266), p = 0.253                 | 0.01               |
| Target PPI before block              | 0.156(-0.006-0.317), p = 0.058                 | 0.078              |
| Control PPI after block              | -0.039(-0.26-0.182), p = 0.72                  | -0.026             |
| Target PPI after block               | 0.055(-0.319-0.429), p = 0.768                 | -0.028             |
| <b>NRS 48-hour at rest</b>           |                                                |                    |
| Surgery type                         | 0.402(-0.271-1.075), p = 0.233                 | 0.014              |
| PCA type                             | -0.053(-0.742-0.637), p = 0.878                | -0.03              |
| Piritramide perioperative in MED, mg | 0.052(-0.018-0.122), p = 0.143                 | 0.036              |
| PCA opioids 24-hour                  | 0(-0.027-0.026), p = 0.978                     | -0.03              |
| PCA opioids 48-hour                  | 0.005(-0.004-0.013), p = 0.294                 | 0.004              |
| Control PPI before block             | -0.043(-0.172-0.086), p = 0.505                | -0.016             |

|                                      |                                 |        |
|--------------------------------------|---------------------------------|--------|
| Target PPI before block              | 0.043(-0.084-0.171), p = 0.496  | -0.016 |
| Control PPI after block              | 0.126(-0.034-0.287), p = 0.119  | 0.044  |
| Target PPI after block               | 0.16(-0.115-0.436), p = 0.245   | 0.012  |
| <b>NRS 48-hour in movement</b>       |                                 |        |
| Surgery type                         | -0.703(-1.941-0.535), p = 0.257 | 0.01   |
| PCA type                             | 0.181(-1.084-1.446), p = 0.773  | -0.028 |
| Piritramide perioperative in MED, mg | 0.119(-0.008-0.246), p = 0.065  | 0.072  |
| PCA opioids 24-hour                  | 0.031(-0.017-0.078), p = 0.197  | 0.021  |
| PCA opioids 48-hour                  | 0.021(0.007-0.036), p = 0.005   | 0.188  |
| Control PPI before block             | 0.174(-0.057-0.405), p = 0.134  | 0.038  |
| Target PPI before block              | 0.353(0.154-0.553), p = 0.001   | 0.26   |
| Control PPI after block              | 0.072(-0.233-0.377), p = 0.634  | -0.023 |
| Target PPI after block               | 0.255(-0.254-0.764), p = 0.316  | 0.001  |

Data presented as unstandardized B coefficient (95% CI), p value. MED – morphine equivalent dose; PCA – patient controlled analgesia; NRS – Numeric rating scale; PACU – post anesthesia care unit, PPI – pupillary pain index.

Regression models for THR and TKR separately.

**Table S3:** Prediction models of postoperative pain scores separately for total hip replacement and total knee replacement surgeries.

| <b>Total hip replacement surgery, N = 18</b>                                              |                                |       |
|-------------------------------------------------------------------------------------------|--------------------------------|-------|
| <b>NRS PACU. Adjusted r squared for the model = 0.032, p-value = 0.038</b>                |                                | VIF   |
| Piritramide perioperative in MER, mg                                                      | 0.047(-0.033-0.128), p = 0.229 | 1     |
| <b>NRS 24-hour at rest. Adjusted r squared for the model = 0.346, p value = 0.03</b>      |                                |       |
| Piritramide perioperative, mg                                                             | 0.104(-0.004-0.212), p = 0.058 | 1.058 |
| Control PPI after block                                                                   | -0.21(-0.547-0.128), p = 0.204 | 1.315 |
| Target PPI after block                                                                    | 0.444(0.083-0.804), p = 0.019  | 1.253 |
| <b>NRS 24-hour in movement. Adjusted r squared for the model = 0.435, p value = 0.011</b> |                                |       |
| Piritramide perioperative, mg                                                             | 0.076(-0.041-0.193), p = 0.185 | 1.343 |
| PCA opioids 24-hour                                                                       | 0.023(-0.013-0.059), p = 0.193 | 1.198 |
| Target PPI before block                                                                   | 0.181(-0.006-0.368), p = 0.057 | 1.178 |
| <b>NRS 48-hour at rest. Adjusted r squared for the model = 0.051, p value = 0.186</b>     |                                |       |
| Target PPI after block                                                                    | 0.139(-0.074-0.352), p = 0.186 | 1     |

|                                                                                             |                                  |        |
|---------------------------------------------------------------------------------------------|----------------------------------|--------|
| <b>NRS 48-hour in movement. Adjusted r squared for the model = 0.723, p value &lt;0.001</b> |                                  |        |
| Piritramide perioperative, mg                                                               | -0.086(-0.216-0.044), p = 0.175  | 1.194  |
| Control PPI before block                                                                    | -1.093(-1.851--0.336), p = 0.008 | 14.287 |
| Target PPI before block                                                                     | 1.699(0.919-2.479), p = 0        | 14.73  |
| Control PPI after block                                                                     | 1.02(0.22-1.821), p = 0.016      | 5.778  |
| <b>Total knee replacement surgery, N = 17</b>                                               |                                  |        |
| <b>NRS PACU. Adjusted r squared for the model = 0.073, p-value = 0.154</b>                  |                                  | VIF    |
| Piritramide perioperative in MER, mg                                                        | 0.068(-0.029-0.165), p = 0.154   | 1      |
| <b>NRS 24-hour at rest. Adjusted r squared for the model = 0.282, p value = 0.151</b>       |                                  |        |
| PCA type                                                                                    | 0.755(-0.646-2.156), p = 0.257   | 1.487  |
| PCA opioids 24-hour                                                                         | 0.053(-0.031-0.137), p = 0.191   | 1.826  |
| Control PPI before block                                                                    | -0.457(-0.925-0.012), p = 0.055  | 6.719  |
| Target PPI before block                                                                     | 0.532(0.14-0.924), p = 0.013     | 5.027  |
| Control PPI after block                                                                     | 0.603(-1.055--0.151), p = 0.014  | 5.076  |
| Target PPI after block                                                                      | 0.876(0.002-1.75), p = 0.05      | 3.05   |
| <b>NRS 24-hour in movement. Adjusted r squared for the model = 0.213, p value = 0.036</b>   |                                  |        |
| Piritramide perioperative, mg                                                               | 0.156(0.012-0.299), p = 0.036    | 1      |
| <b>NRS 48-hour at rest. Adjusted r squared for the model = 0.292, p value = 0.035</b>       |                                  |        |
| Piritramide perioperative, mg                                                               | 0.091(-0.037-0.22), p = 0.15     | 1.135  |
| PCA opioids 48-hour                                                                         | 0.021(-0.004-0.045), p = 0.089   | 1.135  |
| <b>NRS 48-hour in movement. Adjusted r squared for the model = 0.425, p value = 0.028</b>   |                                  |        |
| Piritramide perioperative, mg                                                               | 0.099(-0.059-0.256), p = 0.198   | 1.161  |
| PCA opioids 48-hour                                                                         | 0.021(-0.009-0.052), p = 0.148   | 1.178  |
| Target PPI before block                                                                     | 0.222(-0.03-0.474), p = 0.079    | 1.119  |
| Target PPI after block                                                                      | 0.717(-0.004-1.439), p = 0.051   | 1.12   |

Data presented as unstandardized B coefficient (95% CI), p value. VIF – variance inflation factor; MED – morphine equivalent dose; PCA – patient controlled analgesia; NRS – Numeric rating scale; PACU – post anesthesia care unit, PPI – pupillary pain index.

**Table S4:** Simple regression analysis for independent variables of pain scores separately for total hip and total knee replacement surgeries.

|                                      | Total hip replacement surgery, N = 18          |                    | Total knee replacement surgery, N = 17         |                    |
|--------------------------------------|------------------------------------------------|--------------------|------------------------------------------------|--------------------|
| Simple regression                    | Unstandardized B coefficient (95% CI), p value | Adjusted r squared | Unstandardized B coefficient (95% CI), p value | Adjusted r squared |
| <b>NRS PACU</b>                      |                                                |                    |                                                |                    |
| PCA type                             | 0.25(-0.511-1.011), p = 0.496                  | -0.031             | -0.558(-1.626-0.51), p = 0.283                 | 0.015              |
| Piritramide perioperative in MER, mg | 0.047(-0.033-0.128), p = 0.229                 | 0.032              | 0.068(-0.029-0.165), p = 0.154                 | 0.073              |
| Control PPI before block             | -0.017(-0.158-0.125), p = 0.804                | -0.058             | -0.074(-0.244-0.096), p = 0.37                 | -0.009             |
| Target PPI before block              | -0.009(-0.152-0.135), p = 0.9                  | -0.061             | 0.004(-0.165-0.173), p = 0.956                 | -0.066             |
| Control PPI after block              | 0(-0.235-0.235), p = 1                         | -0.063             | 0.002(-0.192-0.197), p = 0.98                  | -0.067             |
| Target PPI after block               | -0.028(-0.285-0.229), p = 0.822                | -0.059             | -0.047(-0.531-0.436), p = 0.837                | -0.064             |
| <b>NRS 24-hour at rest</b>           |                                                |                    |                                                |                    |
| PCA type                             | 0.083(-1.133-1.3), p = 0.886                   | -0.061             | -0.212(-1.546-1.123), p = 0.74                 | -0.059             |
| Piritramide perioperative in MER, mg | 0.109(-0.01-0.229), p = 0.069                  | 0.141              | 0.129(0.026-0.232), p = 0.018                  | 0.275              |
| PCA opioids 24-hour                  | 0.027(-0.014-0.068), p = 0.178                 | 0.055              | 0.026(-0.045-0.097), p = 0.453                 | -0.026             |
| Control PPI before block             | 0.093(-0.124-0.311), p = 0.377                 | -0.01              | 0.009(-0.202-0.219), p = 0.932                 | -0.066             |
| Target PPI before block              | 0.125(-0.092-0.341), p = 0.239                 | 0.028              | 0.089(-0.109-0.286), p = 0.355                 | -0.006             |
| Control PPI after block              | -0.095(-0.463-0.272), p = 0.59                 | -0.043             | -0.071(-0.302-0.16), p = 0.521                 | -0.037             |
| Target PPI after block               | 0.315(-0.055-0.685), p = 0.09                  | 0.117              | -0.069(-0.652-0.513), p = 0.803                | -0.062             |
| <b>NRS 24-hour in movement</b>       |                                                |                    |                                                |                    |
| PCA type                             | 0.25(-1-1.5), p = 0.677                        | -0.051             | -0.288(-2.068-1.491), p = 0.735                | -0.058             |
| Piritramide perioperative in MER, mg | 0.145(0.032-0.258), p = 0.015                  | 0.273              | 0.156(0.012-0.299), p = 0.036                  | 0.213              |
| PCA opioids 24-hour                  | 0.041(0.001-0.08), p = 0.045                   | 0.18               | 0.052(-0.04-0.144), p = 0.248                  | 0.027              |

|                                      |                                 |        |                                 |        |
|--------------------------------------|---------------------------------|--------|---------------------------------|--------|
| Control PPI before block             | 0.19(-0.017-0.397), p = 0.069   | 0.141  | -0.013(-0.294-0.268), p = 0.921 | -0.066 |
| Target PPI before block              | 0.256(0.066-0.446), p = 0.011   | 0.296  | 0.047(-0.223-0.318), p = 0.715  | -0.057 |
| Control PPI after block              | -0.131(-0.508-0.245), p = 0.47  | -0.027 | -0.047(-0.358-0.264), p = 0.752 | -0.059 |
| Target PPI after block               | 0.111(-0.304-0.526), p = 0.578  | -0.042 | -0.044(-0.822-0.734), p = 0.906 | -0.066 |
| <b>NRS 48-hour at rest</b>           |                                 |        |                                 |        |
| PCA type                             | 0.25(-0.412-0.912), p = 0.435   | -0.022 | 0.019(-1.556-1.594), p = 0.98   | -0.067 |
| Piritramide perioperative in MER, mg | 0.021(-0.052-0.093), p = 0.554  | -0.039 | 0.129(0-0.258), p = 0.05        | 0.182  |
| PCA opioids 24-hour                  | 0.005(-0.019-0.029), p = 0.637  | -0.047 | 0.029(-0.055-0.112), p = 0.473  | -0.029 |
| PCA opioids 48-hour                  | 0.002(-0.005-0.009), p = 0.538  | -0.037 | 0.027(0.003-0.051), p = 0.03    | 0.23   |
| Control PPI before block             | -0.003(-0.127-0.121), p = 0.962 | -0.062 | -0.096(-0.338-0.146), p = 0.413 | -0.018 |
| Target PPI before block              | -0.003(-0.128-0.123), p = 0.962 | -0.062 | 0.069(-0.168-0.305), p = 0.544  | -0.04  |
| Control PPI after block              | 0.031(-0.174-0.236), p = 0.753  | -0.056 | 0.146(-0.117-0.41), p = 0.255   | 0.025  |
| Target PPI after block               | 0.139(-0.074-0.352), p = 0.186  | 0.051  | 0.226(-0.449-0.901), p = 0.486  | -0.032 |
| <b>NRS 48-hour in movement</b>       |                                 |        |                                 |        |
| PCA type                             | -0.417(-2.507-1.674), p = 0.678 | -0.051 | 0.192(-1.889-2.274), p = 0.847  | -0.064 |
| Piritramide perioperative in MER, mg | 0.059(-0.167-0.286), p = 0.587  | -0.043 | 0.151(-0.025-0.327), p = 0.088  | 0.127  |
| PCA opioids 24-hour                  | 0.021(-0.053-0.096), p = 0.552  | -0.039 | 0.027(-0.085-0.138), p = 0.617  | -0.048 |
| PCA opioids 48-hour                  | 0.017(-0.003-0.037), p = 0.098  | 0.109  | 0.034(0.003-0.066), p = 0.035   | 0.213  |
| Control PPI before block             | 0.376(0.046-0.706), p = 0.028   | 0.222  | 0.006(-0.322-0.334), p = 0.968  | -0.067 |
| Target PPI before block              | 0.571(0.324-0.818), p = 0       | 0.575  | 0.198(-0.1-0.496), p = 0.177    | 0.059  |
| Control PPI after block              | -0.273(-0.897-0.351), p = 0.367 | -0.008 | 0.274(-0.057-0.606), p = 0.098  | 0.117  |
| Target PPI after block               | 0.093(-0.606-0.792), p = 0.782  | -0.057 | 0.588(-0.261-1.436), p = 0.161  | 0.069  |

Data presented as unstandardized B coefficient (95% CI), p value. MED – morphine equivalent dose; PCA – patient controlled analgesia; NRS – Numeric rating scale; PACU – post anesthesia care unit, PPI – pupillary pain index.

## Regression models.

Dependent parameters: NRS PACU, NRS 24 and 48 hours at rest and in movement (5 parameters).

For NRS PACU:

Included parameters in the model: type of surgery; type of PCA (tramadol or piritramide); intraoperative piritramide in MED; target PPI before and after block; control PPI before and after block.

For NRS24:

Included parameters in the model: type of surgery; type of PCA (tramadol or piritramide); intraoperative piritramide in MED; PCA opioids 24H postoperative; target PPI before and after block; control PPI before and after block.

For NRS48:

Included parameters in the model: type of surgery; type of PCA (tramadol or piritramide); intraoperative piritramide in MED; PCA opioids 24H postoperative; PCA opioids 48H postoperative; target PPI before and after block; control PPI before and after block.

**Table S5:** Relationship between PPI indices and perioperative opioid consumption

|                              | Intraoperative piritramide in MED | PCA opioids 24-hour      | PCA opioids 48-hour      |
|------------------------------|-----------------------------------|--------------------------|--------------------------|
| Control PPI before the block | r = 0.096, p value = 0.6          | r = -0.13, p value = 0.5 | r = -0.12, p value = 0.5 |
| Target PPI before the block  | r = 0.23, p value = 0.2           | r = -0.11, p value = 0.5 | r = 0.007, p value = 1   |
| Control PPI after the block  | r = -0.23, p value = 0.2          | r = 0.19, p value = 0.3  | r = 0.15, p value = 0.4  |
| Target PPI after the block   | r = 0.001, p value = 1            | r = 0.19, p value = 0.3  | r = 0.19, p value = 0.3  |

. PPI – pupillary pain index; PCA – patient controlled analgesia, MED – morphine equivalent dose. R coefficients are from Spearman correlation test.
